# Supplementary material for: Krypton-85 chronometry of spent nuclear fuel
Source: Copernicus journal article supplement (doi:10.5194/gchron-6-571-2024), 2024-10-25
Supplement: Supplementary file 1 [file gchron-6-571-2024-supplement.zip]

## Sheet: ATM109_report
Supplemental data for 'Krypton-85 chronometry of spent nuclear fuel,' by Balco, G., and 5 co-authors. Includes complete step-heating data for fissiogenic Kr and Xe in ATM-109 FIB "cubes".
Sample name	Distance from edge (um)	Pyrometer temperature (C)	Calibrated temperature (C)	Kr-83 (cps)	+/-	Kr-84 (cps)	+/-	Kr-85 (cps)	+/-	Kr-86 (cps)	+/-	Xe-131 (cps)	+/-	Xe-132 (cps)	+/-	Xe-134 (cps)	+/-	Xe-136 (cps)	+/-
ATM-109-20-54	22	600		3.37	2.19	19.75	9.96	0.17	0.21	9.56	3.21	49.57	2.5	133.54	3.35	168.45	2.32	260.57	2.38
		750		-2.27	1.61	-12.29	7.8	0.43	0.3	-1.05	2.43	7.38	2.22	21.56	2.58	27.5	1.45	41.25	1.2
		900		2.46	2.51	8.67	12.26	0.3	0.19	20.44	3.87	98.33	2.41	242.79	3.49	301.58	2.59	471.86	3
		1100		10.19	0.74	35.06	1.13	0.98	0.2	43.92	1.15	250.07	2.96	614.2	4.42	770.8	5.08	1205.14	6.69
		1150		4.97	0.6	12.21	1.11	0.14	0.18	12.21	0.81	39.22	1.58	82.15	2.34	104.93	1.59	172.26	1.62
		1200		0.79	1.67	-3.89	8.1	-0.01	0.2	8.98	2.53	50.37	1.94	108.86	2.78	143.52	1.9	228.99	1.86
		1250		21.87	0.9	53.64	1.4	1.57	0.24	76.45	1.63	226.15	2.75	467.61	4.03	605.91	4.09	974.47	5.55
		1300		55.25	1.34	137.76	2.16	2.96	0.27	193.92	2.23	724.35	4.92	1517.02	8.3	1984.55	11.38	3106.02	15.8
		1350		4.93	2.15	11.92	10.52	0.3	0.18	24.58	3.33	114.74	2.46	222.93	3.31	297.34	2.37	465.96	3.09
		1400		22.61	2.36	58.13	10.03	1.06	0.28	65.97	3.32	269.49	3.02	540.08	4.39	716.83	4.24	1112.06	5.83
		1450		-2.13	2.28	-13.12	11.18	-0.23	0.19	-2.62	3.42	3.08	1.35	8.39	1.91	18.49	1.11	29.58	0.99
ATM-109-20-55	22	600		-2.04	2.66	-3.45	13.04	0.14	0.21	11.48	4.06	47.88	2.09	146.89	2.97	171.99	2.01	272.7	2.14
		750		1.02	1.85	0.06	8.63	-0.14	0.21	3.78	2.74	8.57	1.82	26.64	2.76	32.78	1.42	51.03	1.24
		1100		8.28	1.88	30.76	8.47	1.09	0.34	35.12	2.79	101.29	2.75	291.43	3.9	343.59	3	545.41	3.97
		1200		3.8	1.78	9.5	8.2	0.19	0.2	13.15	2.69	44.48	2.19	103.47	3.01	130.49	1.84	200.88	2.08
		1250		7.28	1.67	17.4	7.5	0.26	0.24	27.49	2.48	85.17	2.42	179.1	3.27	228.39	2.4	356.86	2.69
		1250		-0.01	2.32	-5.57	11.31	0.29	0.19	5.62	3.53	27.7	1.94	61.42	2.56	79.86	1.49	129.33	1.53
		1300		7.7	1.78	18	8.18	0.21	0.19	22.75	2.63	97.18	2.2	201.92	3.1	266.67	2.65	421.45	3.2
		1350		33.53	3.59	75.54	16.47	1.79	0.24	114.72	5.35	436.82	4.1	907.02	5.47	1194.24	7.09	1862.83	10.25
ATM-109-60-54	70	600		2.46	1.82	13.43	8.84	0.67	0.3	11.04	2.81	22.62	1.85	86.77	2.83	99.9	1.7	152.9	1.57
		750		1.48	1.8	8.85	8.73	0.2	0.2	7.07	2.79	10.63	2.04	43.24	2.83	44.02	1.48	67.36	1.32
		900		4.42	2.49	18.69	11.76	0.38	0.23	39.3	3.78	88.5	2.17	329.49	3.64	372.26	2.81	602.89	4.05
		1100		11.57	1.93	45.27	8.86	1.58	0.36	59.74	2.92	236.3	2.77	658.77	4.71	804.54	4.97	1261.87	6.46
		1150		3.09	0.4	12.2	0.78	0.33	0.19	16.64	0.84	66.5	2.09	174.33	2.85	209.81	2.02	329.3	2.45
		1200		0.53	1.78	1.7	8.64	0.22	0.2	8.47	2.72	30.68	2.07	78.95	2.63	98.48	1.51	151.98	1.68
		1250		3.96	1.85	12.54	8.97	-0.23	0.29	24.72	2.87	85.84	2.09	213.17	2.87	274.16	2.55	425.58	2.92
		1300		13.1	1.73	32.41	8.24	1.28	0.21	65.51	2.79	255.14	2.8	635.06	4.64	801.68	5	1262.9	6.73
		1350		22.91	1.95	69.47	8.41	1.33	0.21	96.9	2.93	385.79	3.61	915.02	5.78	1166.61	7.6	1819.58	10
		1400		37.42	1.05	118.95	1.66	1.51	0.21	150.37	1.8	490.12	4	1236.95	8	1546.87	8.71	2427.92	12.6
ATM-109-60-55	70	600		1.61	1.75	5.71	8.46	0.24	0.19	7.09	2.6	25.34	1.85	79.92	2.76	96.06	1.83	149.11	1.66
		750		1.34	1.65	10.36	7.98	-0.59	0.3	5.86	2.46	12.15	2	49.55	2.88	55.46	1.49	83.47	1.55
		1100		24.92	1.97	84.3	8.48	1.08	0.23	113.85	3.04	410.05	4.31	1171.59	7.87	1438.61	9.07	2248.88	14.22
		1200		6.6	1.74	26.67	8.35	1.08	0.3	39.99	2.83	108.97	2.58	302.53	3.21	365.61	3.26	572.95	4.16
		1250		4.82	2.11	18.62	10.28	0.43	0.22	31.02	3.28	117.04	2.48	301.42	3.4	366.51	2.88	572.31	3.57
		1250		5.13	1.7	17.42	8.16	0.56	0.21	28.7	2.63	98.61	2.26	261.95	3.22	324.55	2.87	511.86	3.53
		1300		19.94	1.92	69.61	8.38	1.13	0.22	92.51	2.98	283.79	3.33	814.42	5.95	990.39	5.78	1541.6	9.18
		1350		14.66	2.74	37.94	12.57	1.25	0.21	79.29	4.1	306.25	3.77	783.68	6.48	972.13	5.65	1515.65	8.2
ATM-109-120-01	122	600	593	-17	5.03	-62.56	24.28	0	0	-18.53	7.68	12.27	4.53	54.42	5.11	69.81	4.49	106.8	4.38
		1100	1036	24.36	1.7	112.79	3.61	1.17	0.19	124.11	3.06	551.67	5.31	2122.98	13.74	2448.6	18.74	3832.6	36.25
		1200	1119	-4.23	3.92	-36.73	18.82	0	0	3.21	5.87	39.3	4.49	122.22	5.26	146.27	4.76	222.9	4.24
		1300	1201	0.21	4.17	11.67	17.8	0.19	0.12	26.89	5.6	95.4	4.78	345.35	6.21	413.66	6.32	637.87	8.58
		1400	1281	19.28	6.21	67.41	22.4	2.11	0.26	143.59	8.24	477.94	7.56	1573.4	12.21	1909.93	15.96	2970.46	29.73
		1450	1321	63.3	2.33	241.66	4.24	4.54	0.31	326.18	7.26	820.83	7.68	2605.25	11.39	3134.05	18.51	4856.76	36.59
		1500	1360	68.61	1.85	238.39	3.54	3.66	0.36	337.94	5.31	885.11	8.8	2605.83	10.51	3166.45	20.45	4950.19	37.81
		1550	1399	1.21	3.41	-1.73	15.21	0	0	18.49	5.17	60.19	2.65	154.99	3.02	188.58	2.97	273.7	3.65
ATM-109-120-02	122	600	593	22.62	4.59	112.88	21.1	1.61	0.24	170.61	7.42	336.35	4.74	1307.97	6.6	1517.35	13.18	2353.46	23.9
		1450	1321	119.82	4.46	487.2	17.41	6.18	0.46	674.7	9.04	1642.57	10.51	5747.84	15.31	6771.6	36.11	10566.5	79.06
		1500	1360	77.39	5.13	298.43	24.36	5.17	0.39	431.52	9.02	1185.5	9.31	3662.42	8.75	4493.53	26.62	6906.74	51.27
		1550	1399	71.55	2.87	244.51	3.58	4.61	0.37	326.01	5.09	849.75	6.99	2540.79	11.38	3065.66	18.54	4738.29	36.52
		1600	1437	4.11	1.62	28.08	2.86	0	0	9.28	1.83	-3.6	4.01	2.76	3.87	5.14	3.07	3.88	2.76
ATM-109-400-01	397	600	593	120.94	5.85	642.99	25.23	10.32	0.51	936.77	15.06	1502.6	7.1	7560.64	28.27	8541.65	47.73	13046.9	115.44
		1300	1201	29.41	3.82	99.05	16.22	1.59	0.24	133.64	6.52	290.05	6.08	1078.5	10.24	1317.35	9.39	1973.97	20.76
		1400	1281	35.77	4.4	113.5	20.17	3.05	0.26	205	8.23	395.43	6.28	1513.77	11.91	1840.16	15.01	2833.57	28.55
		1450	1321	99.3	2.42	452.93	5.26	5.95	0.44	605.72	6.31	1147.99	8.9	4535.76	13.4	5314.97	28.38	8106.18	59.44
		1500	1360	131.14	3.72	535.57	5.46	7.03	0.45	742.09	9.33	1362.64	6.63	5335.14	14.33	6275.09	34.41	9641.39	70.31
		1550	1399	5.18	4.33	34.74	19.95	1.04	0.18	75.86	6.28	205.74	4.43	697.84	3.96	832.92	5.93	1274.45	12.28
ATM-109-400-02	397	600	593	31.39	1.76	154.4	3.26	1.29	0.23	181.28	4.07	158.86	5.08	685.15	6.59	807.16	7.68	1247.56	12.55
		1450	1321	219.4	5.01	936.74	18.3	12.49	1	1347.36	13.56	2863.38	13.65	10577.3	23.27	12609.9	67.13	19175	136.14
		1500	1360	158.97	3.04	676.82	4.84	9.71	0.48	919.39	8.83	1842.7	11.39	6762.33	13.4	8089.68	43.39	12306.5	88.55
		1550	1399	93.33	2.62	370.22	4.05	5.31	0.33	471.46	5.58	926.12	5.51	3427.73	12.4	4097.83	25.37	6356.08	47.82
		1600	1437	3.16	3.5	21.32	16.05	0	0	2.36	5.49	2.1	4.28	6.35	4.49	10.66	3.46	9.6	2.35
ATM-109-800-01	790	600	593	-2.11	3.41	-5.55	16.16	0	0	-2.71	5.27	9.05	4.12	31.92	4.21	33.44	2.5	57.9	3.26
		1300	1201	32.99	4.11	137.22	18.21	4.66	0.5	252.17	8.61	439.28	6.83	1876.59	15.77	2238.42	13.53	3407.43	31.12
		1400	1281	81.83	2.91	366.54	6.96	5.23	0.31	447.06	9.07	696.45	9.18	2977.21	12.01	3521.5	21.98	5449.12	51.26
		1450	1321	143.3	3.02	684.64	4.43	9.68	0.55	930.79	9.42	1524.62	10.77	6429.05	16.32	7608.23	37.56	11452.9	84.64
		1500	1360	237.08	3.88	1130.77	10	15.47	0.63	1562.8	14.5	2577.34	13.3	10844.6	23.27	12840.2	61.8	19507.9	138.76
		1550	1399	320.98	5.88	1546.96	17.98	24.36	0.87	2201.31	22.53	3665.95	17.21	15298.7	30.17	18124.7	84.48	27212.9	193.6
		1600	1437	42.96	4.97	195.19	22.84	3.63	0.33	324.69	8.55	597.01	5.06	2457.02	7.41	2933.63	19.17	4401.27	33.84
ATM-109-800-02	790	600	593	163.73	5.37	794.29	18.27	11.3	0.53	1109.85	15.93	1518.57	8.21	7577.82	29.26	8749.96	50.22	13347.1	117.97
		1450	1321	257.72	3.87	1193.66	5.44	18.98	0.69	1603.58	14.68	3121.23	15.67	12458.2	33.16	14854.3	72.26	22564.5	160.52
		1500	1360	130.03	3.82	475.08	5.11	6.48	0.46	661.34	7.32	1280.89	8.81	4740.53	11.58	5712.14	31.58	8692.97	64.89
		1600	1437	21.4	1.6	82.27	3.4	0.61	0.15	97.81	2.2	197.38	4.01	646.34	4.62	781.4	6.03	1171.37	9.83
ATM-109-1600-01	1562	600	593	4.01	1.25	32.36	5	0	0	21.75	2.69	80.75	4.44	368.56	4.98	430.09	4.7	647.82	7.05
		1300	1201	25.24	5.78	109.7	22.38	1.15	0.23	140.27	7.25	281.16	6.21	1073.86	8.9	1304.27	12.9	1976.13	20.47
		1400	1281	62.25	4.78	264.1	21.57	4.26	0.3	356.91	10.24	740.79	9.21	2685.26	13.11	3270.75	20.8	5034.92	45.37
		1450	1321	136.73	4.86	558.22	18.43	9.21	0.41	799.91	10.13	1590.04	10.1	5990.49	16.39	7167.91	37.52	10848.9	77.66
		1500	1360	218.63	4.13	962.79	5.44	18.61	1.25	1363.26	15.09	2372.54	12.99	9326.75	25.26	11216.7	54.84	17051.1	121.33
		1550	1399	6.81	1.46	18.44	4.38	0	0	19.33	3.22	40.68	3.2	121.08	3.91	146.29	3.29	211.29	4.36
ATM-109-1600-02	1572	600	593	5.79	1.54	16.81	5.94	0	0	17.06	2.68	17.85	4.14	52.94	4.63	66.97	3.96	99.69	3.36
		1450	1321	218.82	3.82	1016.03	5.48	16.69	0.66	1421.06	15.61	2453.65	12.21	9791.83	20.35	11720.2	56.78	17795	124.12
		1500	1360	387.16	5.17	1812.52	6.77	26.21	1.02	2535.52	26.42	4110.13	20.45	16789.5	32.22	20173	92.72	30606	215.59
		1550	1399	5.08	1.54	21.32	4.61	0	0	7.1	1.68	5.22	3.16	-4.16	3.48	5.39	2.13	0.21	1.57
ATM-109-3200-01	3115	600	593	-8.29	4.74	-48.38	22.57	0	0	0.15	7.33	142.88	5.21	664.65	6.76	776.07	6.13	1141.28	11.65
		1300	1201	154.3	4.27	695.76	6.45	10.1	0.52	867.15	13.43	1922.86	15.31	7595.46	29.44	9314.38	47.5	14163.9	124.93
		1400	1281	32.16	5.89	134.97	25.16	2.79	0.29	238.64	9.61	495.73	9.41	1801.85	12.32	2216.95	18.3	3400.76	32.8
		1450	1321	73.99	3.74	325.69	15.03	6.28	0.36	476.18	6.96	927.8	5.94	3421.3	8.45	4171.58	23.59	6344.99	49.82
		1500	1360	73.99	4.98	313.86	22.14	5.6	0.43	486.84	9.87	1020.39	8.72	3678.52	13.35	4489	27.63	6779.86	49.9
		1550	1399	38.99	3.76	158.81	15.77	1.22	0.49	244.57	5.72	516.71	5.99	1876.61	7.33	2266.11	14.59	3380.72	27.53
		1600	1437	-14.16	5.1	-73.4	24.03	0	0	-17.08	7.46	7.71	3.78	4.07	4.77	9.56	3.08	6.98	2.83
ATM-109_3-1	3905	1150		3.73	3.7	18.41	15.78	0	0	33.58	5.6	39.45	2.91	159.18	3.11	200.85	3.62	299.03	3.84
		1200		10.94	3.86	40.97	16.75	0.88	0.49	97.71	6.84	129.88	3.85	495.75	5.3	632.26	6.43	915.43	7.96
		1200		5.5	2.88	3.65	12.27	0	0	33.53	4.9	39.58	2.8	158.01	2.92	209.95	4.46	311.04	5.02
		1250		41.43	4.11	206.98	16.44	2.76	0.99	277.13	7.83	361.84	5.05	1397.59	7.4	1719.41	14.06	2601.06	17.29
		1250		39.3	3.62	184.2	13.47	4.67	0.83	308.6	7.84	388.31	5.51	1528	7.35	1842.73	12.06	2783.94	16.9
		1300		69.04	4.27	293.3	12.79	5.93	0.95	439.1	9.77	560.28	4.78	2102.55	9.3	2603.37	15.82	3942.45	24.73
		1300		19.37	3.29	93.41	13.02	0.54	0.53	149.24	5.55	202.4	3.7	706.21	5.01	888.72	7.56	1354.4	9.77
		1350		85.96	4.32	357.58	16.12	3.78	0.95	529.47	10.03	710.79	6.94	2630.49	8.26	3227.78	18.53	4895.63	25.26
		1350		102.5	4.58	448.56	15.24	8.5	1.19	675.31	12.44	861.88	6.1	3412.84	13.09	4180.63	25.88	6341.33	34.8
		1400		247.8	6.6	1070.56	18.29	19.26	1.82	1585.82	22.82	2054.02	9.1	7854.33	16.07	9560.81	45.63	14489.5	72
		1400		232.33	6.19	1002.78	16.51	22.03	1.63	1446.13	17.81	1855.67	8.7	7139.52	16.09	8755.48	42.78	13272.7	63.21
		1450		159.15	5.52	671.93	16.01	10.71	1.34	1038.83	14.34	1306.15	8.98	5007.08	13.1	6092.11	31.72	9182.73	45.94
ATM-109_3-2	3910	1600		24.98	5.36	104.41	21.71	2.28	0.8	219.37	8.38	271.04	4.57	1043.76	6.78	1279.11	10.76	1889.7	14.96
		1600		23.76	6.19	118	25.48	2.87	0.8	223.16	10.51	287.8	4.67	1092.71	6.34	1366.19	10.97	2026.64	16.65
		1700		137.42	7.55	582.48	25.48	13.34	1.23	887.42	14.57	1110.06	8.82	4349.13	14.1	5326.91	29.9	7988.34	51.78
		1700		114.87	7.14	447.41	29.08	8.85	1.19	707.29	14.68	949	8.6	3604.79	13.08	4361.69	26.55	6690.17	46.22
		1800		309.01	9.15	1323.05	28.95	26.81	2.34	1918.96	23.11	2469.55	13.08	9367.23	21.61	11476	62.58	17426.2	111.41
		1800		141.58	7.12	600.76	24.57	15.1	1.17	892.63	14.36	1125.55	9	4336.1	14.11	5299.36	28.31	8006.94	55.01
ATM-109_3-3	3915	1300		135.98	5.73	571.63	16.01	10.41	0.68	883.77	12.62	1148.01	9.06	4433.88	13.27	5511.9	31.59	8241.99	56.26
		1300		30.42	4.25	113.74	15.84	1.5	0.41	200.57	7.74	238.39	4.75	928.64	6.9	1141.82	11.61	1706.33	14.08
		1350		40.1	4.62	169.3	16.17	2.59	0.39	265.25	8.52	332.73	5.69	1259.59	7.22	1537.76	13.5	2345.51	19.07
		1350		40.28	4.31	186.04	15.52	3.06	0.47	331.1	8.36	429.24	6.32	1618.93	7.5	2003.1	14.55	3011.72	23.67
		1400		69.97	5.04	269.89	15.82	5.8	0.47	459.16	10.15	612.37	6.79	2239.42	8.15	2762.69	17.71	4140.03	30.34
		1400		104.82	5.5	453.63	23.02	6.1	0.69	585.05	11.78	728.36	4.71	2698.99	10.03	3311.53	23.11	4952.07	46.83
		1400		90.11	8.34	321.88	37.79	5.16	0.45	452.11	15.55	591.49	8.37	2190.51	11.73	2711.34	17.41	4151.71	39.86
		1450		135.66	8.52	595.28	31.28	9.74	0.62	829.97	16.03	1005.69	9.64	3839.74	12.09	4747.19	26.42	7284.3	67.36
		1450		66.34	6.76	254.67	30.66	1.93	0.76	384.12	11.78	494.34	7.48	1815.77	9.86	2239.41	15.98	3398.81	31.69
		1500		64.01	4.13	263.08	15.17	4.35	0.51	391.8	8.66	530.75	5.39	2005.67	11.73	2401.99	15.19	3694.08	35.93
		1500		132.1	6.21	516.98	23.18	9.65	0.62	784	16.63	1083.04	6.09	3910.99	15.54	4806.63	27.88	7360.31	66.33
Notes:
Data shown are detector count rates after correction for mass discrimination, detector gains, and atmospheric contamination. The atmospheric corrections are based on Kr-80 and Xe-129.
Instrument sensitivity is constant for all heating steps for each sample, but differs for samples measured in different analytical sessions. Thus, amounts of gas released from different samples cannot be compared accurately from this table.
Apparent negative values in some steps derive from the atmospheric correction and are retained so that the uncertainty budget is complete for summed gas amounts used to compute summary isotope ratios for each sample.
"Pyrometer temperature" refers to heating temperature measured by an uncalibrated optical pyrometer. This may differ from the actual temperature by up to 200°C at high temperature.
"Calibrated temperature" is the true heating temperature inferred from calibration of the pyrometer temperature for the emissivity of the Ta packet. Where not shown, an uncalibrated apparatus was used.
This work was performed under the auspices of the U.S. Department of Energy by Lawrence Livermore NaIonal Laboratory under Contract DE-AC52-07NA27344. This is LLNL-MI-858188.
