# Supplementary material for: Krypton-85 chronometry of spent nuclear fuel
Source: Copernicus journal article supplement (doi:10.5194/gchron-6-571-2024), 2024-10-25
Supplement: Supplementary file 1 [file gchron-6-571-2024-supplement.zip]

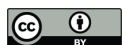

*Supplement of*

## **Krypton-85 chronometry of spent nuclear fuel**

**Greg Balco et al.**

*Correspondence to:* Greg Balco (balco1@llnl.gov)

- gchron-6-571-2024-supplement-title-page.pdf
- ATM109\_complete\_table.xlsx

The copyright of individual parts of the supplement might differ from the article licence.
